# Supplementary material
Source: PubMed Central journal article supplement (PMC10898217)
Supplement: NIHMS1912984-supplement-Supplemental_Material.pdf [file NIHMS1912984-supplement-Supplemental_Material.pdf]

Appendix A: Results from Logistic and Multinomial Logistic Regression Models Estimating the Moderating Effects of Imbalanced SRFBs and No Education on the Effects of Firstborn Sex on the Odds, Frequency, and Severity of Intimate partner violence Within the Last Year, Including Two-Way Interaction Terms

|                      | Psychological     |                   |                   | Physical          |                   |                   | Sexual            |                   |                   |
|----------------------|-------------------|-------------------|-------------------|-------------------|-------------------|-------------------|-------------------|-------------------|-------------------|
|                      | II                |                   |                   | V                 |                   |                   | VII               |                   |                   |
|                      | Any               | Some-times        | Often             | Any               | Often             | Severe            | Any               | Some-times        | Often             |
| Firstborn female     | 0.97<br>(0.04)    | 0.96<br>(0.04)    | 1.02<br>(0.08)    | 0.96<br>(0.03)    | 1.06<br>(0.07)    | 0.97<br>(0.04)    | 0.94<br>(0.05)    | 0.92<br>(0.06)    | 1.00<br>(0.11)    |
| Imbalanced SRFB      | 0.95<br>(0.06)    | 1.01<br>(0.07)    | 0.77*<br>(0.08)   | 1.08<br>(0.05)    | 0.93<br>(0.09)    | 1.13*<br>(0.07)   | 1.00<br>(0.07)    | 0.85†<br>(0.08)   | 1.08<br>(0.15)    |
| No education         | 0.95<br>(0.04)    | 1.00<br>(0.05)    | 0.81*<br>(0.07)   | 1.09*<br>(0.04)   | 1.15*<br>(0.08)   | 1.07†<br>(0.05)   | 1.11*<br>(0.06)   | 0.92<br>(0.06)    | 0.88<br>(0.10)    |
| Female*Imbalanced    | 1.11<br>(0.07)    | 1.14†<br>(0.08)   | 1.01<br>(0.14)    | 1.19**<br>(0.06)  | 0.96<br>(0.11)    | 1.13†<br>(0.07)   | 1.28***<br>(0.10) | 1.07<br>(0.09)    | 0.84<br>(0.15)    |
| Female*No education  | 1.03<br>(0.06)    | 1.03<br>(0.06)    | 1.05<br>(0.11)    | 0.99<br>(0.04)    | 0.91<br>(0.08)    | 1.01<br>(0.05)    | 0.97<br>(0.06)    | 1.06<br>(0.08)    | 1.09<br>(0.16)    |
| Constant             | 0.26***<br>(0.03) | 0.19***<br>(0.02) | 0.07***<br>(0.01) | 0.75***<br>(0.06) | 0.18***<br>(0.03) | 0.41***<br>(0.04) | 0.34***<br>(0.04) | 0.22***<br>(0.03) | 0.06***<br>(0.02) |
| Observations         | 57,820            | 57,820            | 57,820            | 57,845            | 57,845            | 57,845            | 57,845            | 57,846            | 57,846            |
| Demographic controls | X                 | X                 | X                 | X                 | X                 | X                 | X                 | X                 | X                 |

Note: Demographic controls include respondents' religion, caste, wealth quintile, recent employment, urban residence, age at first birth, and marital duration at first birth.

Robust standard errors, clustered by survey cluster, in parentheses

\*\*\* p<0.001, \*\* p<0.01, \* p<0.05, † p<0.10, two-tailed test

Appendix B: Results from Logistic and Multinomial Logistic Regression Models Estimating the Moderating Effects of Imbalanced SRFBs and No Education on the Effects of Firstborn Sex on the Odds, Frequency, and Severity of Intimate partner violence Within the Last Year, Including a Three-Way Interaction Term

|                          | Psychological     |                   |                   | Physical          |                   |                   | Sexual            |                   |                   |                   |                   |
|--------------------------|-------------------|-------------------|-------------------|-------------------|-------------------|-------------------|-------------------|-------------------|-------------------|-------------------|-------------------|
|                          | II                |                   |                   | IV                |                   |                   | VI                |                   |                   |                   |                   |
|                          | Any               | Some-times        | Often             | Any               | Some-times        | Often             | Moderate          | Severe            | Any               | Some-times        | Often             |
| Firstborn female         | 0.97<br>(0.04)    | 0.96<br>(0.05)    | 1.00<br>(0.08)    | 0.97<br>(0.03)    | 0.95<br>(0.04)    | 1.10<br>(0.08)    | 0.98<br>(0.04)    | 0.97<br>(0.05)    | 0.97<br>(0.06)    | 0.96<br>(0.06)    | 1.01<br>(0.12)    |
| Imbalanced SRFB          | 0.87†<br>(0.07)   | 0.92<br>(0.08)    | 0.76*<br>(0.11)   | 1.10<br>(0.07)    | 1.10<br>(0.07)    | 1.12<br>(0.14)    | 1.11<br>(0.08)    | 1.09<br>(0.10)    | 0.89<br>(0.09)    | 0.87<br>(0.10)    | 0.96<br>(0.18)    |
| No education             | 0.92†<br>(0.04)   | 0.96<br>(0.05)    | 0.81*<br>(0.07)   | 1.10*<br>(0.04)   | 1.07<br>(0.05)    | 1.23*<br>(0.10)   | 1.06<br>(0.05)    | 1.14*<br>(0.06)   | 0.92<br>(0.06)    | 0.94<br>(0.07)    | 0.85<br>(0.11)    |
| Female*Imbalanced        | 1.11<br>(0.11)    | 1.12<br>(0.12)    | 1.11<br>(0.22)    | 1.11<br>(0.08)    | 1.19*<br>(0.09)   | 0.78<br>(0.13)    | 1.11<br>(0.10)    | 1.11<br>(0.13)    | 0.88<br>(0.12)    | 0.92<br>(0.15)    | 0.74<br>(0.21)    |
| Female*No education      | 1.04<br>(0.06)    | 1.02<br>(0.07)    | 1.08<br>(0.12)    | 0.96<br>(0.05)    | 0.99<br>(0.05)    | 0.84†<br>(0.08)   | 1.00<br>(0.06)    | 0.92<br>(0.07)    | 1.00<br>(0.08)    | 0.98<br>(0.09)    | 1.07<br>(0.18)    |
| Imbalanced* No education | 1.18<br>(0.12)    | 1.21†<br>(0.13)   | 1.05<br>(0.20)    | 0.96<br>(0.08)    | 1.03<br>(0.09)    | 0.71*<br>(0.12)   | 1.05<br>(0.10)    | 0.86<br>(0.10)    | 1.02<br>(0.14)    | 0.95<br>(0.15)    | 1.24<br>(0.32)    |
| Female* Imbal.* No educ. | 0.98<br>(0.13)    | 1.02<br>(0.15)    | 0.83<br>(0.24)    | 1.14<br>(0.12)    | 1.08<br>(0.12)    | 1.45<br>(0.35)    | 1.04<br>(0.13)    | 1.29<br>(0.20)    | 1.41†<br>(0.27)   | 1.49†<br>(0.32)   | 1.21<br>(0.47)    |
| Constant                 | 0.27***<br>(0.03) | 0.20***<br>(0.02) | 0.07***<br>(0.01) | 0.74***<br>(0.06) | 0.58***<br>(0.05) | 0.17***<br>(0.03) | 0.41***<br>(0.04) | 0.33***<br>(0.04) | 0.22***<br>(0.03) | 0.16***<br>(0.02) | 0.06***<br>(0.02) |
| Observations             | 57,820            | 57,820            | 57,820            | 57,845            | 57,845            | 57,845            | 57,845            | 57,845            | 57,846            | 57,846            | 57,846            |
| Demographic controls     | X                 | X                 | X                 | X                 | X                 | X                 | X                 | X                 | X                 | X                 | X                 |

Note: Demographic controls include respondents' religion, caste, wealth quintile, recent employment, urban residence, age at first birth, and marital duration at first-birth. Robust standard errors, clustered by survey cluster, in parentheses  
\*\*\* p<0.001, \*\* p<0.01, \* p<0.05, † p<0.10, two-tailed test

Appendix C: Odds-Ratios From Logistic Regressions Estimating the Effects of the Sex the First Two Children and Controls on Intimate partner violence

|                                                   | Any psychological |                   |                   | Any physical      |                   |                   | Any sexual |        |
|---------------------------------------------------|-------------------|-------------------|-------------------|-------------------|-------------------|-------------------|------------|--------|
|                                                   | I                 | II                | III               | IV                | V                 | VI                |            |        |
| First two mixed                                   | 0.96<br>(0.05)    | 0.95<br>(0.05)    | 0.97<br>(0.04)    | 0.96<br>(0.04)    | 1.03<br>(0.07)    | 1.05<br>(0.08)    |            |        |
| First two female                                  | 0.99<br>(0.07)    | 0.98<br>(0.07)    | 0.99<br>(0.05)    | 1.00<br>(0.06)    | 1.04<br>(0.09)    | 1.11<br>(0.10)    |            |        |
| Imbalanced SRFB                                   | 0.92<br>(0.07)    | 0.81*<br>(0.09)   | 1.08<br>(0.07)    | 1.05<br>(0.09)    | 1.02<br>(0.12)    | 1.08<br>(0.16)    |            |        |
| No education                                      | 0.89*<br>(0.05)   | 0.85*<br>(0.06)   | 1.08<br>(0.05)    | 1.07<br>(0.06)    | 0.93<br>(0.07)    | 0.95<br>(0.08)    |            |        |
| First two mixed * imbalanced SRFB                 | 1.15†<br>(0.10)   | 1.20<br>(0.14)    | 1.10<br>(0.07)    | 1.11<br>(0.10)    | 0.93<br>(0.11)    | 0.84<br>(0.14)    |            |        |
| First two female * imbalanced SRFB                | 1.08<br>(0.11)    | 1.11<br>(0.17)    | 1.17†<br>(0.10)   | 1.07<br>(0.13)    | 0.85<br>(0.13)    | 0.56*<br>(0.13)   |            |        |
| First two mixed * no education                    | 1.06<br>(0.07)    | 1.08<br>(0.09)    | 1.00<br>(0.06)    | 1.01<br>(0.06)    | 1.00<br>(0.09)    | 0.96<br>(0.10)    |            |        |
| First two female * no education                   | 1.07<br>(0.09)    | 1.09<br>(0.11)    | 0.99<br>(0.07)    | 0.96<br>(0.07)    | 1.08<br>(0.12)    | 0.97<br>(0.12)    |            |        |
| Imbalanced SRFB * no education                    |                   | 1.27<br>(0.18)    |                   | 1.05<br>(0.12)    |                   | 0.90<br>(0.18)    |            |        |
| First two mixed * imbalanced SRFB * no education  |                   | 0.92<br>(0.16)    |                   | 0.97<br>(0.13)    |                   | 1.22<br>(0.29)    |            |        |
| First two female * imbalanced SRFB * no education |                   | 0.94<br>(0.20)    |                   | 1.17<br>(0.18)    |                   | 1.97*<br>(0.59)   |            |        |
| Constant                                          | 0.27***<br>(0.03) | 0.27***<br>(0.03) | 0.66***<br>(0.06) | 0.66***<br>(0.06) | 0.19***<br>(0.03) | 0.19***<br>(0.03) |            |        |
| Observations                                      | 47,060            | 47,060            | 47,079            | 47,079            | 47,077            | 47,077            |            | 47,077 |
| Demographic controls                              | X                 | X                 | X                 | X                 | X                 | X                 |            | X      |

Note: Demographic controls include respondents' religion, caste, wealth quintile, recent employment, urban residence, age at first birth, and marital duration at first-birth. Robust standard errors, clustered by survey cluster, in parentheses. \*\*\* p<0.001, \*\* p<0.01, \* p<0.05, † p<0.10, two-tailed test

Appendix D: Odds-Ratios from Regression Models Estimating the Moderating Effects of Various Sex Ratios on the Effects of Firstborn Sex on Intimate partner violence

|                                    | Any psychological |                   |                   | Any physical      |                   |                   | Any sexual        |                  |                   |                   |                   |                   |
|------------------------------------|-------------------|-------------------|-------------------|-------------------|-------------------|-------------------|-------------------|------------------|-------------------|-------------------|-------------------|-------------------|
|                                    | I                 | II                | III               | IV                | V                 | VI                | VII               | VIII             | IX                | X                 | XI                | XII               |
| Firstborn female                   | 0.95<br>(0.08)    | 1.03<br>(0.11)    | 1.08<br>(0.05)    | 0.94<br>(0.07)    | 0.98<br>(0.07)    | 0.91<br>(0.09)    | 0.99<br>(0.04)    | 1.02<br>(0.07)   | 0.93<br>(0.13)    | 1.00<br>(0.19)    | 0.97<br>(0.06)    | 1.09<br>(0.18)    |
| Imbalanced SRB                     | 1.06<br>(0.08)    |                   |                   |                   | 1.45***<br>(0.10) |                   |                   |                  | 1.35*<br>(0.16)   |                   |                   |                   |
| Imbalanced SRLB                    |                   | 1.02<br>(0.10)    |                   |                   |                   | 1.45***<br>(0.12) |                   |                  |                   | 1.62**<br>(0.25)  |                   |                   |
| Imbalanced SRTB                    |                   |                   | 1.15**<br>(0.06)  |                   |                   |                   | 1.28***<br>(0.05) |                  |                   |                   | 0.76***<br>(0.05) |                   |
| Imbalanced SRDB                    |                   |                   |                   | 0.90<br>(0.07)    |                   |                   |                   | 0.85**<br>(0.05) |                   |                   |                   | 1.90***<br>(0.23) |
| No education                       | 0.95<br>(0.04)    | 0.95<br>(0.04)    | 0.95<br>(0.04)    | 0.96<br>(0.04)    | 1.09*<br>(0.04)   | 1.09*<br>(0.04)   | 1.10**<br>(0.04)  | 1.12**<br>(0.04) | 0.91†<br>(0.05)   | 0.90†<br>(0.05)   | 0.92<br>(0.05)    | 0.88*<br>(0.05)   |
| Firstborn female * imbalanced SRB  | 1.05<br>(0.09)    |                   |                   |                   | 1.02<br>(0.08)    |                   |                   |                  | 1.03<br>(0.15)    |                   |                   |                   |
| Firstborn female * imbalanced SRLB |                   | 0.96<br>(0.11)    |                   |                   |                   | 1.10<br>(0.11)    |                   |                  |                   | 0.95<br>(0.18)    |                   |                   |
| Firstborn female * imbalanced SRTB |                   |                   | 0.87**<br>(0.05)  |                   |                   |                   | 1.00<br>(0.04)    |                  |                   |                   | 0.98<br>(0.07)    |                   |
| Firstborn female * imbalanced SRDB |                   |                   |                   | 1.07<br>(0.09)    |                   |                   |                   | 0.97<br>(0.07)   |                   |                   |                   | 0.86<br>(0.14)    |
| Firstborn female * no education    | 1.03<br>(0.06)    | 1.04<br>(0.06)    | 1.03<br>(0.06)    | 1.03<br>(0.06)    | 0.99<br>(0.04)    | 0.99<br>(0.04)    | 0.99<br>(0.04)    | 1.00<br>(0.04)   | 1.06<br>(0.08)    | 1.06<br>(0.08)    | 1.06<br>(0.08)    | 1.07<br>(0.08)    |
| Constant                           | 0.24***<br>(0.03) | 0.25***<br>(0.03) | 0.24***<br>(0.02) | 0.29***<br>(0.04) | 0.53***<br>(0.06) | 0.51***<br>(0.06) | 0.65***<br>(0.06) | 0.88<br>(0.09)   | 0.16***<br>(0.03) | 0.13***<br>(0.03) | 0.25***<br>(0.03) | 0.11***<br>(0.02) |
| Observations                       | 57,820            | 57,820            | 57,820            | 57,820            | 57,845            | 57,845            | 57,845            | 57,845           | 57,846            | 57,846            | 57,846            | 57,846            |
| Demographic controls               | X                 | X                 | X                 | X                 | X                 | X                 | X                 | X                | X                 | X                 | X                 | X                 |

Note: Demographic controls include respondents' religion, caste, wealth quintile, recent employment, urban residence, age at first birth, and marital duration at first-birth. Robust standard errors, clustered by survey cluster, in parentheses  
\*\*\* p<0.001, \*\* p<0.01, \* p<0.05, † p<0.10, two-tailed test
